# Supplementary material
Source: PubMed Central journal article supplement (PMC3187425)
Supplement: supp_193_19_5487__1.pdf [file supp_193_19_5487__1.pdf]

SCHU S4 PIIA (FLAG-tag)

FSLVELMVVIAIIAILAAVAIPMYSNY**T**TRAQLGSDLSALGGAKATVA**E**RIANN  
GDASQVTILQANAAANGLPS**G**ASVAAGTISYPSTVSGATIQLAPTVSSGAITWTC  
NISGVASQVPSNCNAIDYKDDDDK

Sequence coverage: (AA) 67%

| Peptide (detected)          | MH <sup>+</sup> |
|-----------------------------|-----------------|
| GLPSGA*                     | 501.2667        |
| KDDDDK                      | 735.3155        |
| SALGGAKAT                   | 775.4308        |
| VSSGAITW*                   | 820.4199        |
| VAERIANN                    | 858.4679        |
| RAQLGSDL                    | 859.4632        |
| GGAKATVAEK                  | 931.5207        |
| AQLGSDLSAL                  | 974.5153        |
| GSDLSALGGAK                 | 975.5105        |
| TTRAQLGSDL                  | 1061.5585       |
| RAQLGSDLSAL                 | 1130.6164       |
| AIDYKDDDDK                  | 1197.5269       |
| LAPT <u>V</u> SSGAITW*      | 1202.6415       |
| AQLGSDLSALGGAK              | 1287.6903       |
| TTRAQLGSDLSAL               | 1332.7117       |
| ANAAANGLPSGASVAAG*          | 1398.6972       |
| IANNNGDASQVTIL              | 1429.7281       |
| AGTISYPSTVSGATI <b>Q</b>    | 1552.7853       |
| VAEKIANNNGDASQVT            | 1630.8031       |
| VAEKIANNNGDASQVTIL          | 1856.9712       |
| GGAKATVAEKIANNNGDASQVTIL    | 2342.2310       |
| SALGGAKATVAEKIANNNGDASQVTIL | 2613.3842       |

\*= glycopeptide

Supplementary Fig. 1. Top: Primary structure of mature (prepilin peptidase processed) PilA from Type A strain SCHU S4 showing coverage of peptides identified by MS (red) and serine attachment sites (underlined). Gray highlighting indicates SGA motifs associated with attachment sites (underlined serines - note that there is a third SGA glycosylation motif between the two noted here). The sole difference between PilA from Type B strain FSC200 and that shown here is the presence of a lysine as opposed to the arginine shown here in bold.

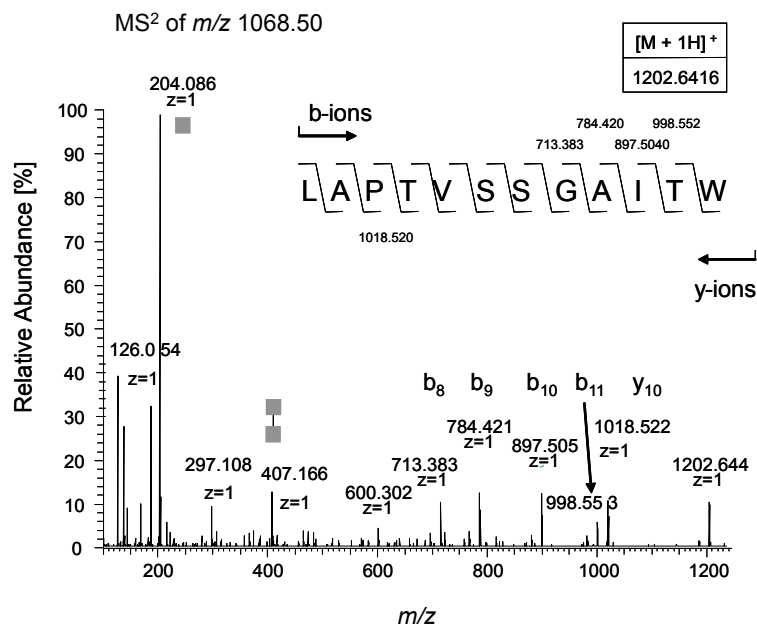

Supplementary Fig. 2. MS<sup>2</sup> spectrum of the doubly charged peptide at  $m/z$  1068.50<sup>2+</sup> eluting at 70.76 minutes confirms that the peptide <sup>97</sup>LAPT VSSGAI TW<sup>108</sup> is modified with HexNAc-Hex-Hex-HexNAc-HexNAc. Identity of the peptide is confirmed by the fragment ions b<sub>8</sub> to b<sub>11</sub> at  $m/z$  713.383 to 998.553, respectively, as well as the accurate peptide mass of 1202.642 Da (+2.5 ppm).

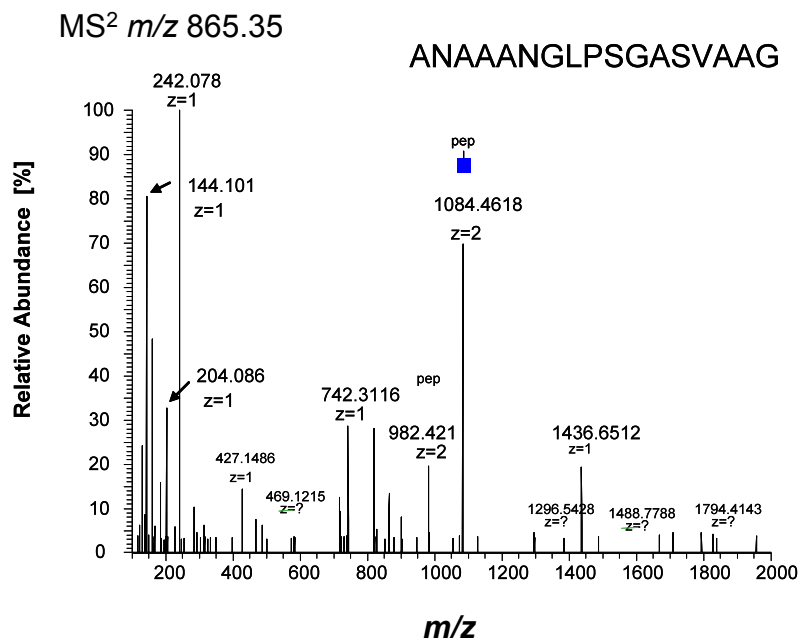

Supplementary Fig. 3. Identification the PilA peptide <sup>66</sup>ANAAANGLPSGASVAG<sup>81</sup> purified from *F. tularensis subsp. tularensis* SCHU S4 carrying the pentasaccharide plus the 242.067 Da moiety. Note the presence of the oxonium ions at  $m/z$  204.086 and 242.078 corresponding to hexose and compound X respectively. The signal at  $m/z$  1084.461 corresponds to the peptide carrying the HexNAc moiety (blue square).

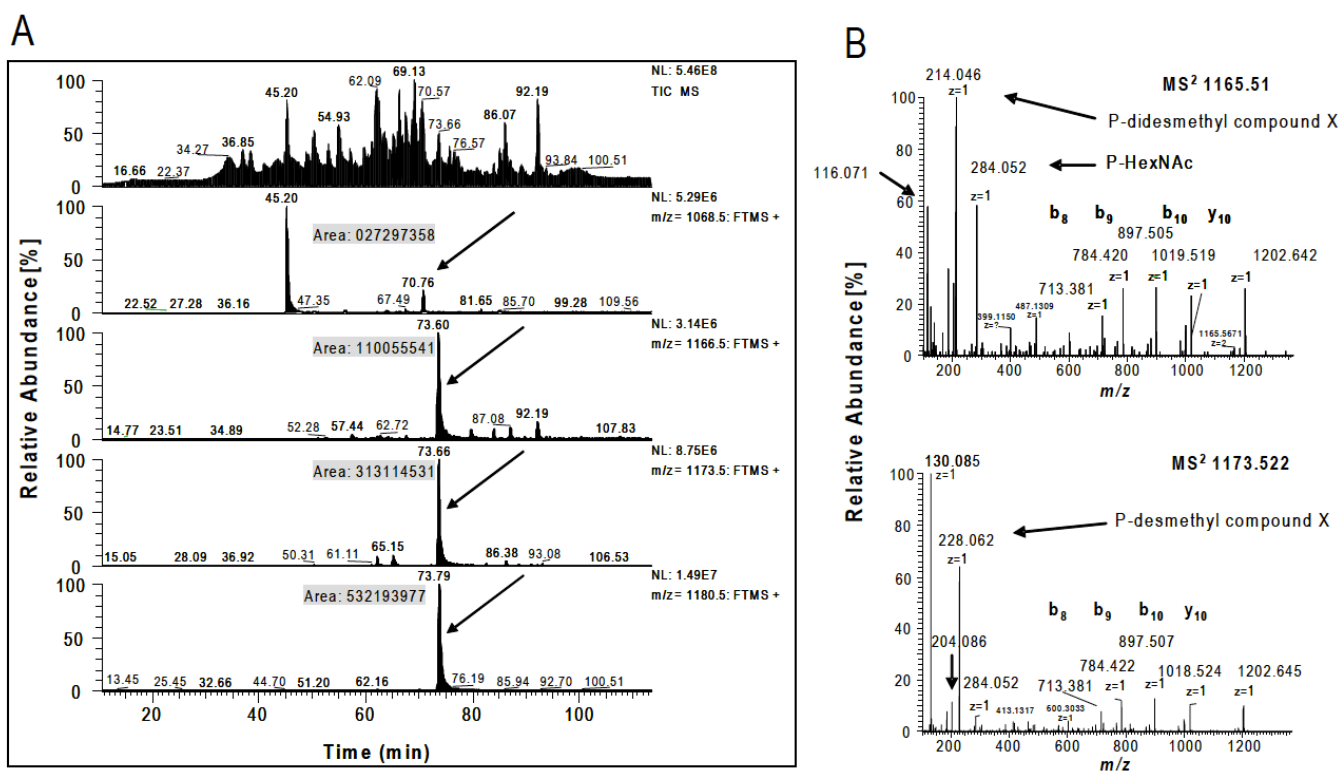

Supplementary Fig 4. MS detection of microheterogeneity related to PilA glycosylation. (A) Top panel represents the total ion chromatogram (TIC), and lower panels show the selected ion (SIC) chromatogram of fragments yielding ions at  $m/z$  204.086, since glycopeptides containing HexNAc gives rise to this diagnostic oxonium ion by HCD-induced fragmentation. (B) MS<sup>2</sup> spectra of glycopeptide with increased retention times (eluting at 73.60 minutes -  $m/z$  1166.51<sup>2+</sup> and 73.66 minutes -  $m/z$  1173.52<sup>2+</sup>) showing that they represent the peptide <sup>97</sup>LAPT<sup>V</sup>S<sup>S</sup>G<sup>A</sup>I<sup>T</sup>W<sup>108</sup> with altered forms of the glycan. Note the common fragment ions as well as unique ions in the lower molecular  $m/z$  range at  $m/z$  242.067 / 144.100,  $m/z$  228.062 / 130.085 and  $m/z$  214.046 / 116.071 that suggest differences relating to varying degrees of methylation of an otherwise identical compound X.

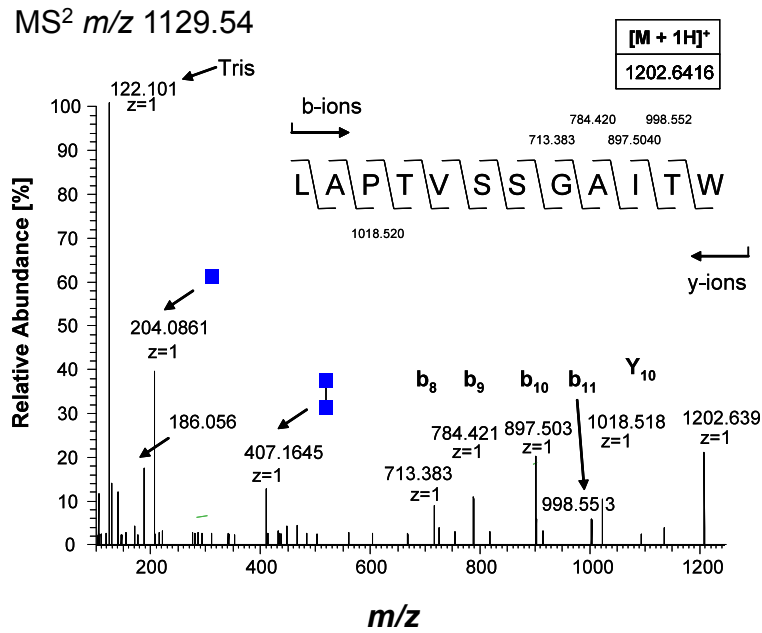

Supplementary Fig. 5. MS<sup>2</sup> characterization of PilA-derived glycopeptide purified from *F. tularensis* subsp. *holarctica* FSC749 (wildtype). Identity of the peptide is confirmed by the fragment ions b<sub>8</sub> to b<sub>11</sub> at  $m/z$  713.383 to 998.553, respectively, as well as the accurate peptide mass of 1202.642 Da (+2.5 ppm).

The presence of signals related to HexNAc are noted with blue squares.
